# Supplementary material for: Biobased Terpene Derivatives: Stiff and Biocompatible Compounds to Tune Biodegradability and Properties of Poly(butylene succinate)
Source: MDPI journal article supplement (doi:10.3390/polym14010161), 2021-12-31
Supplement: s1 [file s1]

Supplementary Materials:

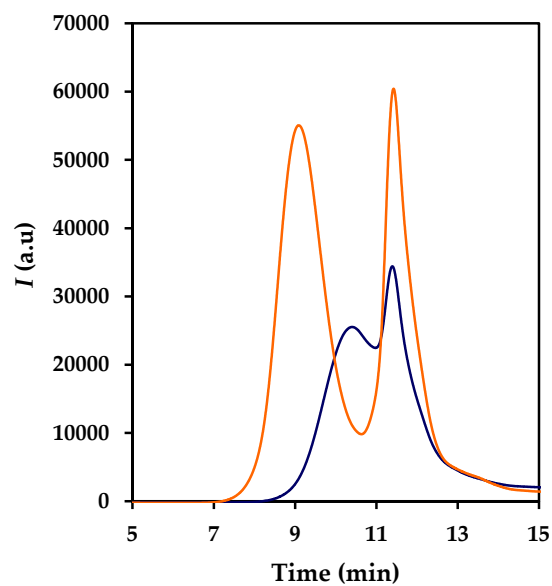

**Figure S1.** GPC curves for poly(Myristic acid/MA-LO) (orange) and PLC (blue) samples. Peaks at the high retention time (i.e., 12 min) corresponds to the salts of the elution medium.

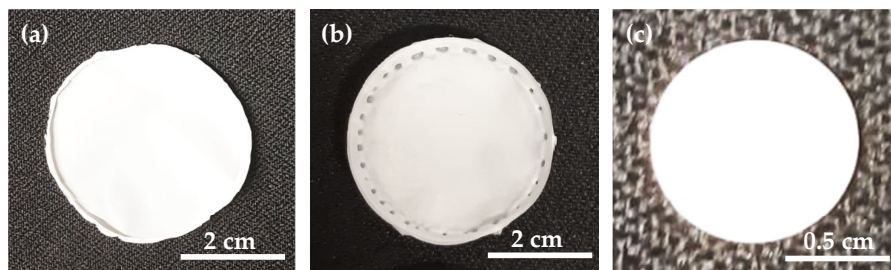

**Figure S2.** Solvent casting films obtained from PBS/poly(PA-LO) 70:30 (a), PBS/poly(PA-LO) 50:50 (b) and a pressed tablet of pure poly(PA-LO) (c).

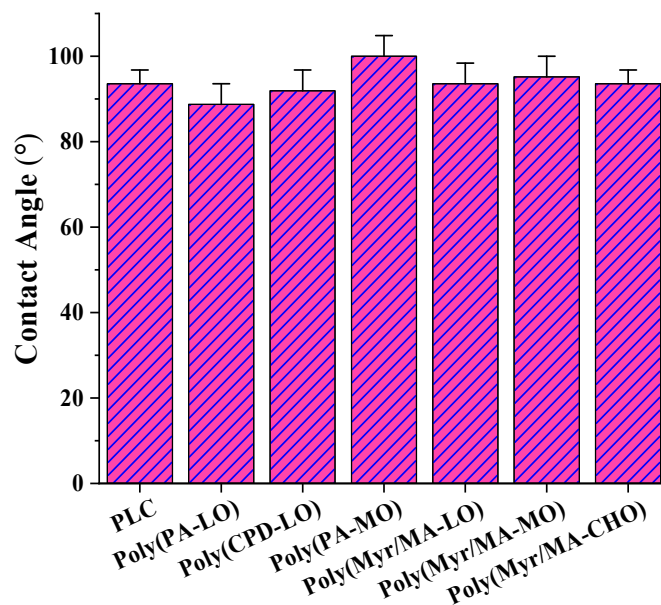

**Figure S3.** Contact angles determined from the different pressed tablets of the studied terpene derivatives.

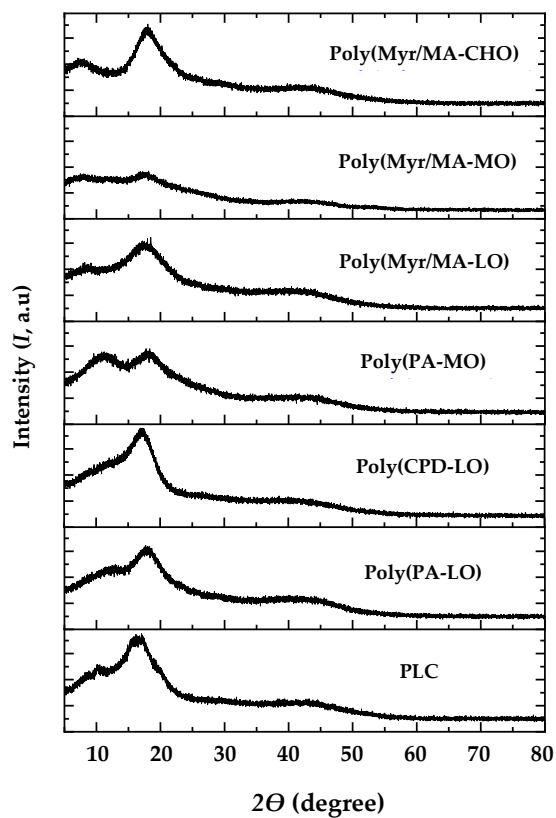

**Figure S4.** X-ray diffraction profiles of the as synthesized powdered samples of the different terpene derivatives.

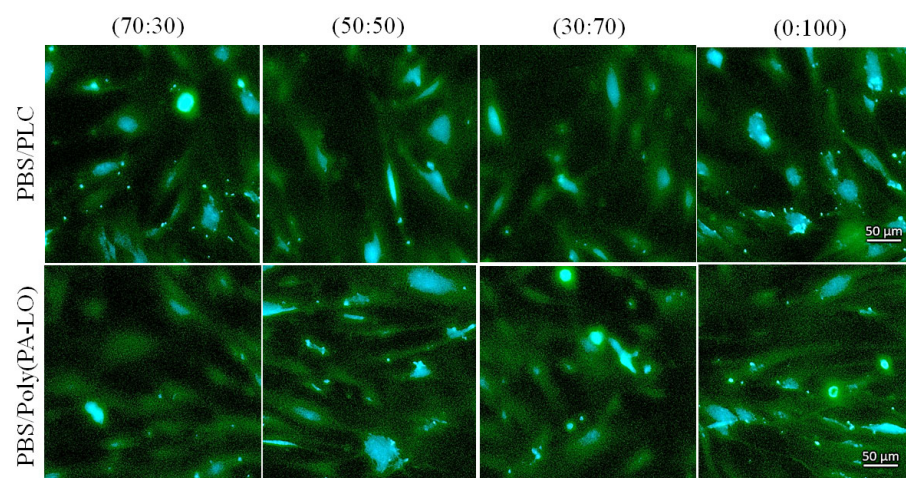

**Figure S5.** Fluorescence images of the proliferated hFF fibroblasts on the different surfaces of the PBS/PLC and PBS/poly(PA-LO) blends. The cytoplasm was stained with phalloidin (green) and the nucleus with Hoechst (blue).
